# Supplementary material for: Synchrotron-Based Fourier-Transform Infrared Micro-Spectroscopy (SR-FTIRM) Fingerprint of the Small Anionic Molecule Cobaltabis(dicarbollide) Uptake in Glioma Stem Cells
Source: MDPI journal article supplement (doi:10.3390/ijms22189937), 2021-09-14
Supplement: s1 [file s1]

## SUPPORTING INFORMATION

# Synchrotron-Based Fourier-Transform Infrared Micro-SPECTROSCOPY (SR-FTIRM) Fingerprint of the Small Anionic Molecule Cobaltabis(dicarbollide) Uptake in Glioma Stem Cells

Miquel Nuez-Martínez <sup>1,†</sup>, Leire Pedrosa <sup>2,†</sup>, Immaculada Martinez-Rovira <sup>3,4</sup>, Ibraheem  
Yousef <sup>4</sup>, Diouldé Diao <sup>2</sup>, Francesc Teixidor <sup>1</sup>, Elisabetta Stanzani <sup>5</sup>, Fina Martínez-Soler <sup>6</sup>,  
Avelina Tortosa <sup>6</sup>, Àngels Sierra <sup>2,\*</sup>,  
José Juan Gonzalez <sup>2</sup> and Clara Viñas <sup>1,\*</sup>

<sup>1</sup> Institut de Ciència de Materials de Barcelona, ICMA-B-CSIC, Campus  
Universitat Autònoma de Barcelona, 08193 Bellaterra, Spain; mnuez@icmab.es  
(M.N.-M.); teixidor@icmab.es (F.T.)

<sup>2</sup> Laboratory of Experimental Oncological Neurosurgery, Neurosurgery Service,  
Hospital Clinic de Barcelona—FCRB, 08036 Barcelona, Spain;  
lepedrosa@clinic.cat (L.P.); dioulde.dg@gmail.com (D.D.); jjgonzal@clinic.cat  
(J.J.G.)

<sup>3</sup> Ionizing Radiation Research Group (GRII), Physics Department, Universitat  
Autònoma de Barcelona (UAB), Avinguda de l'Eix Central, Edifici C. Campus  
de la UAB, 08193 Cerdanyola del Vallès, Spain;  
Immaculada.Martinez@uab.cat

<sup>4</sup> ALBA-CELLS Synchrotron, MIRAS Beamline, Carrer de la Llum 2-26, 08290  
Cerdanyola del Vallès, Spain; iyousef@cells.es

<sup>5</sup> Laboratory of Pharmacology and Brain Pathology, IRCCS Humanitas Research  
Hospital, 20089 Rozzano, Italy; stanzani.elisabetta@gmail.com

<sup>6</sup> Apoptosis and Cancer Unit, Department of Physiological Sciences, IDIBELL,  
Faculty of Medicine and Health Sciences, Universitat de Barcelona, 08007  
L'Hospitalet del Llobregat, Spain;  
finamartinez@ub.edu (F.M.-S.); atortosa@ub.edu (A.T.)

\* Correspondence: masierra@clinic.cat (À.S.); clara@icmab.es (C.V.)

† The authors contributed equally to the work.

## INDEX

|                                                                                                                                                                                                                                                                                                                                                           | Page |
|-----------------------------------------------------------------------------------------------------------------------------------------------------------------------------------------------------------------------------------------------------------------------------------------------------------------------------------------------------------|------|
| <b>Figure S1.</b> Average spectra (left) and the corresponding 2 <sup>nd</sup> derivative of the average spectra at the DNA region (1350-900 cm <sup>-1</sup> ).                                                                                                                                                                                          | 3    |
| <b>Figure S2.</b> PCA and loadings in the DNA region (1350-900 cm <sup>-1</sup> ) of GICs samples treated 5 h with Na[o-COSAN] 2Mm.                                                                                                                                                                                                                       | 4    |
| <b>Figure S3.</b> SR-IRFT average spectra of GICs samples in the fingerprint proteins region 1800-1350 cm <sup>-1</sup> after 5 h Na[o-COSAN] 200 μM                                                                                                                                                                                                      | 5    |
| <b>Figure S4.</b> GIC7 control vs GIC incubated with Na[o-COSAN] 2 mM:<br>a) Fingerprint PCA and loadings of the GIC7 samples in the proteins region.<br>b) Amide I deconvolutions.<br>PG88 control vs PG88 incubated with Na[o-COSAN] 2 mM:<br>c) Fingerprint PCA and loadings of the PG88 samples in the proteins region.<br>d) Amide I deconvolutions. | 6    |
| <b>Figure S5.</b> Average spectra of GICs cell samples in the lipids región after incubated with Na[o-COSAN] 200μM.                                                                                                                                                                                                                                       | 7    |
| <b>Figure S6.</b> PCA and loadings of GICs cell samples in the lipids region incubated with Na[COSAN] 2mM.                                                                                                                                                                                                                                                | 8    |
| <b>Table S1.</b> Amide I / Amide II ratios of absorbance in GIC7 and PG88 samples.                                                                                                                                                                                                                                                                        | 9    |
| <b>Table S2.</b> Ratios of 2960 cm <sup>-1</sup> and 2921 cm <sup>-1</sup> signals in GIC7 and PG88 samples.                                                                                                                                                                                                                                              | 9    |
| <b>Table S3.</b> Ratios of 3010 cm <sup>-1</sup> band integral and 2850 cm <sup>-1</sup> band integral in GIC7 and PG88 samples.                                                                                                                                                                                                                          | 10   |
| <b>Table S4.</b> Statistical data from representative DNA, protein and lipid different peaks comparing GIC7 and PG88 cells.                                                                                                                                                                                                                               | 10   |
| <b>Table S5.</b> Statistical data from representative DNA, protein and lipid different peaks in 200 μm Na[o-COSAN] 5 h treated v.s. untreated GIC7 and PG88 cells.                                                                                                                                                                                        | 11   |

**Figure S1.** Average spectra (left) and the corresponding 2<sup>nd</sup> derivative of the average spectra (right) at the DNA region (1350-900 cm<sup>-1</sup>). **a)** GIC7 and **b)** PG88 treated with Na[o-COSAN] 200 μM (red line) and untreated respective controls (blue line).

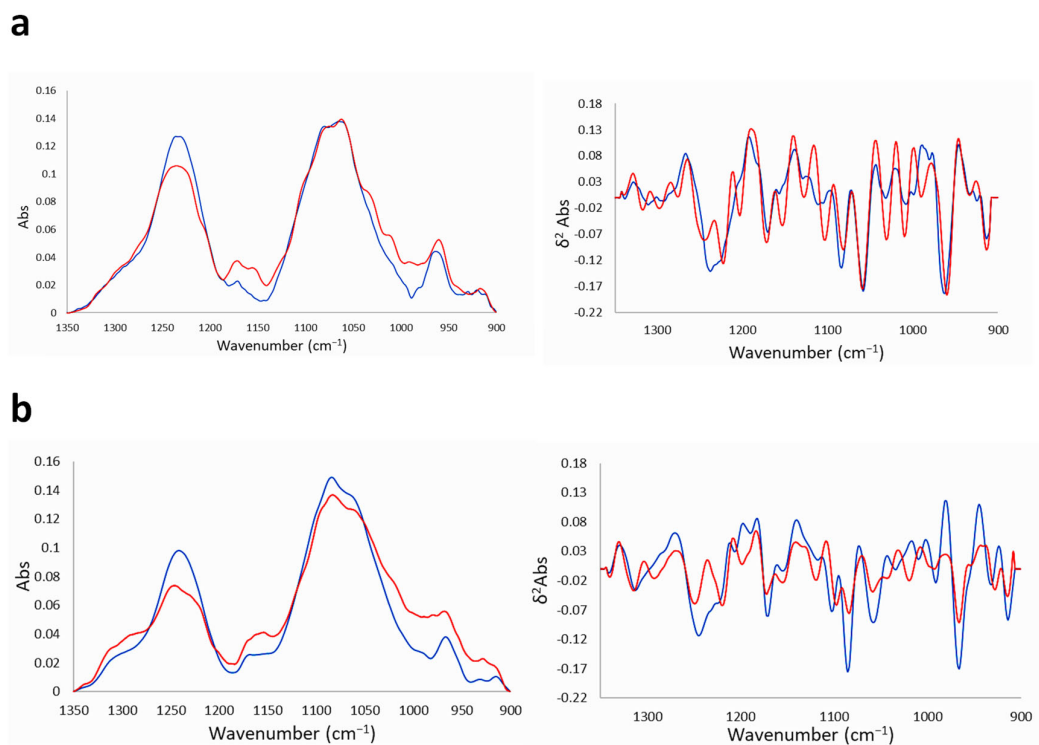

**Figure S2.** PCA and loadings in the DNA region (1350-900  $\text{cm}^{-1}$ ) of GICs samples treated 5 h with Na[*o*-COSAN] 2mM: **a)** GIC7 cells control (light blue) v.s. GIC7 treated (blue) and **b)** PG88 cells control (light blue) v.s. PG88 treated (blue). Average spectra (left) and the corresponding 2nd derivative of the average spectra (right) at the DNA region are showed in the upper panels. Left-bottom panels of **a)** and **b)**: Principal components (blue PC-1, orange PC-2, grey PC-3). Right-bottom of **a)** and **b)**: Principal component analysis scores plot of PC-1, PC-2 and PC-3 displaying the variance between control and treated GICs.

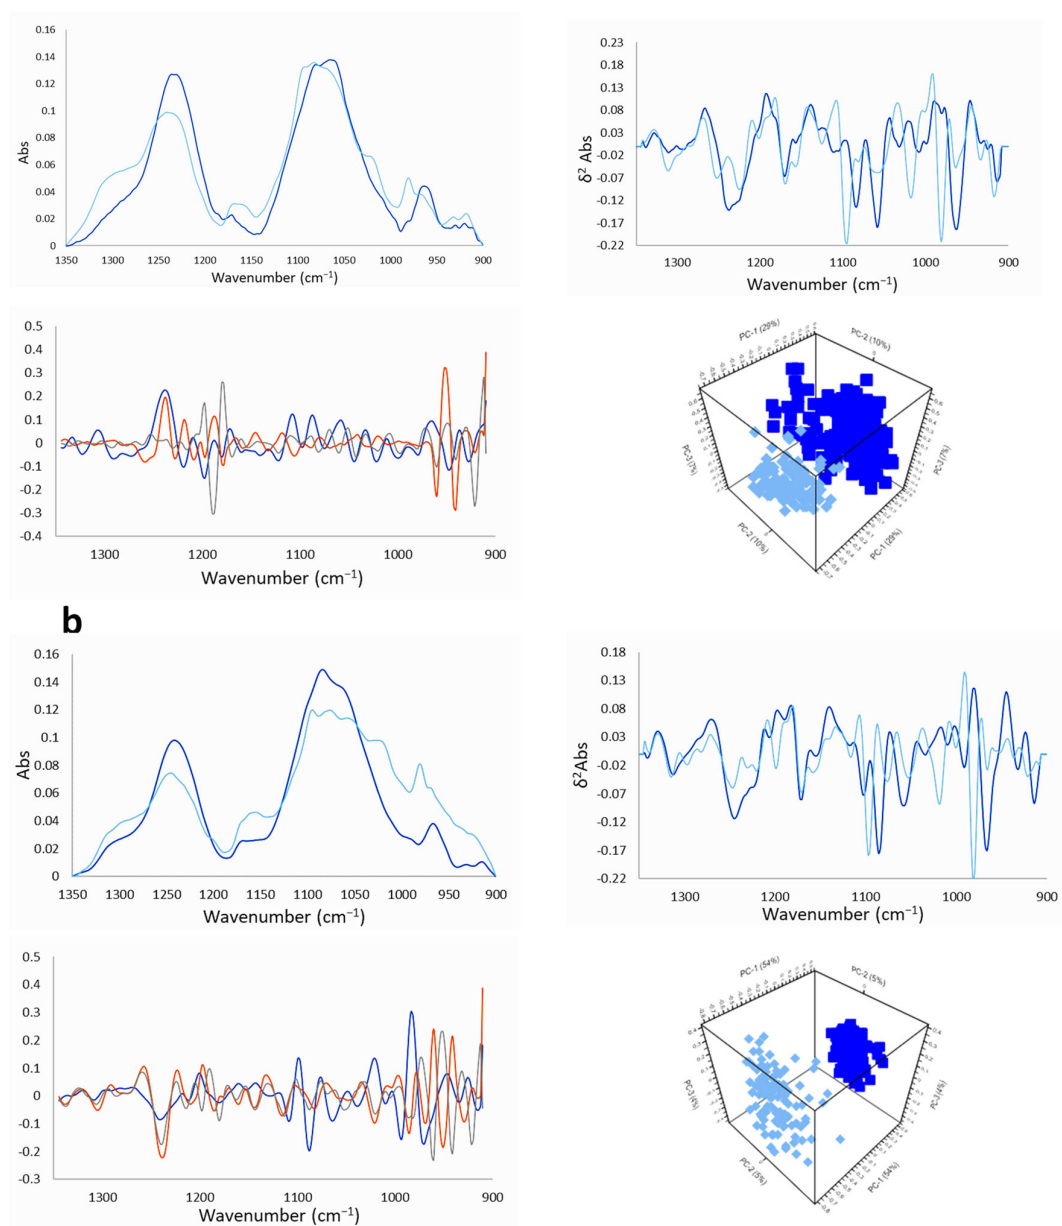

**Figure S3.** SR-IRFT average spectra of GICs samples in the fingerprint proteins region 1800-1350  $\text{cm}^{-1}$  after 5 h Na[*o*-COSAN] 200  $\mu\text{M}$ : a) GIC7 control (blue) vs GIC7 treated (red) and b) PG88 control (blue) vs PG88 treated (red).

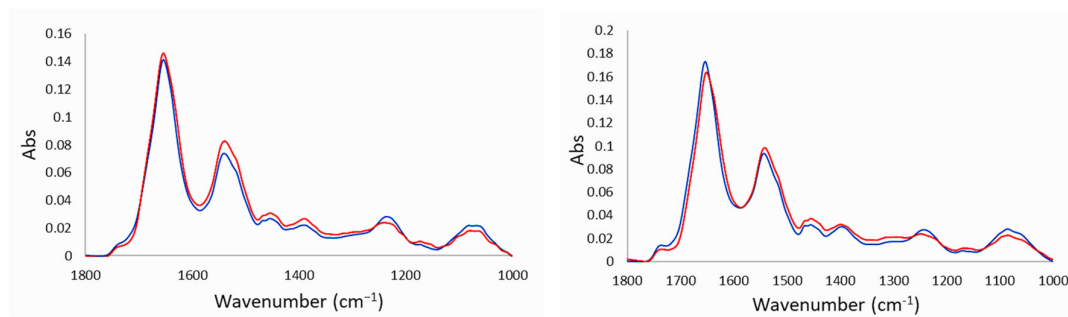

**Figure S4.** a) Fingerprint PCA and loadings of the GIC7 samples in the proteins region of SR-IRFT spectra. GIC7 control vs GIC incubated with Na[*o*-COSAN] 2 mM. b) Amide I deconvolutions for GIC7 2 mM sample and summary of GIC7 Control (in blue), GIC7 200  $\mu$ M (in red dotted) and GIC7 2 mM (in black dotted). c) Fingerprint PCA and loadings of the PG88 samples in the proteins region of SR-IRFT spectra. PG88 control vs PG88 incubated with Na[*o*-COSAN] 2 mM. d) Amide I deconvolutions for PG88 2 mM sample and summary of PG88 Control (in blue), PG88 200  $\mu$ M (in red dotted) and PG88 2 mM (in black dotted). The deconvolutions follow the following code: Amide I-experimental in dark blue, Sidechain in orange,  $\beta$ -sheet in grey,  $\alpha$ -helix in blue,  $\beta$ -turn in green,  $\beta$ -sheet antiparallel in black and Amide I-calculated in red dotted.

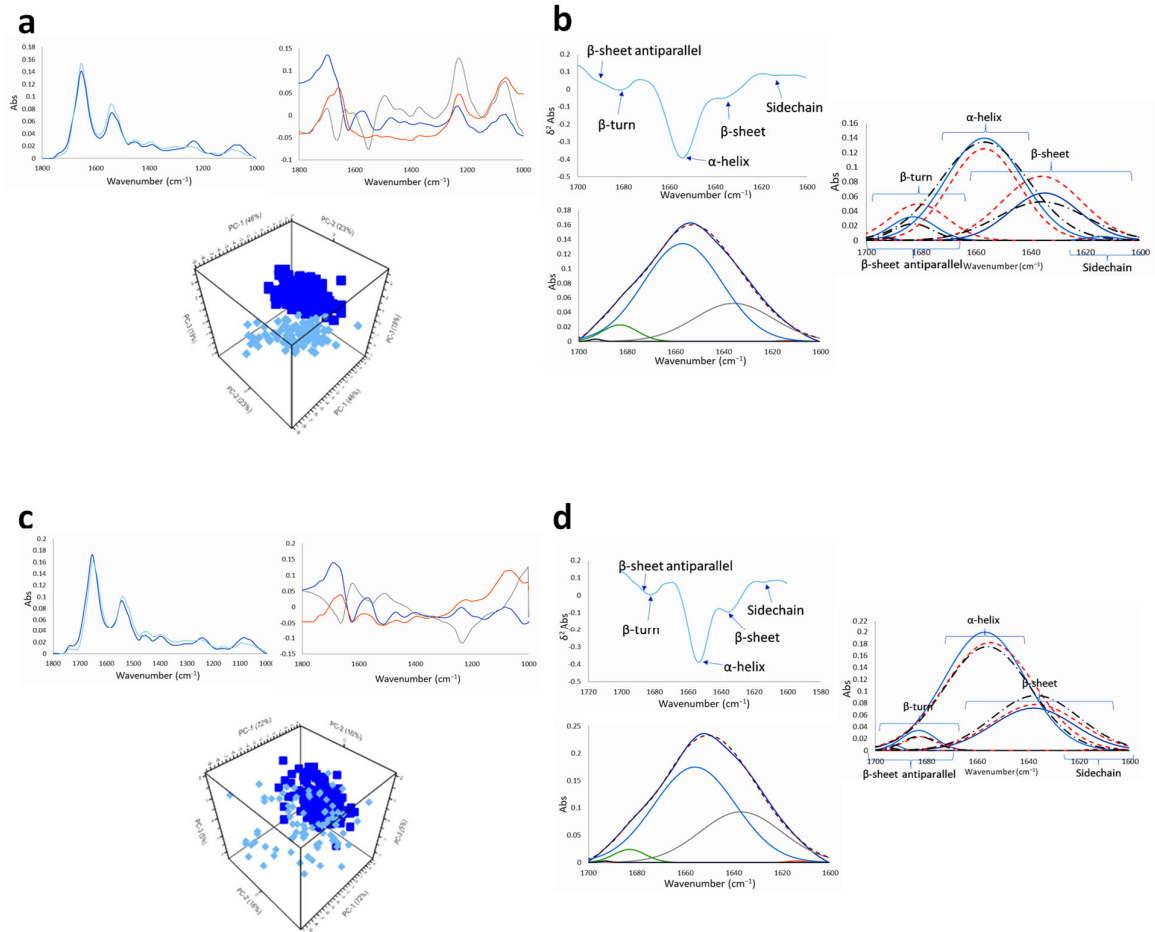

**Figure S5.** a) Average spectra of GICs cell samples in the lipids region. GIC7 control vs GIC7 incubated with Na[o-COSAN] 200 $\mu$ M. b) Average spectra of PG88 cell samples in the lipids region. PG88 control vs PG88 incubated with Na[o-COSAN] 200 $\mu$ M.

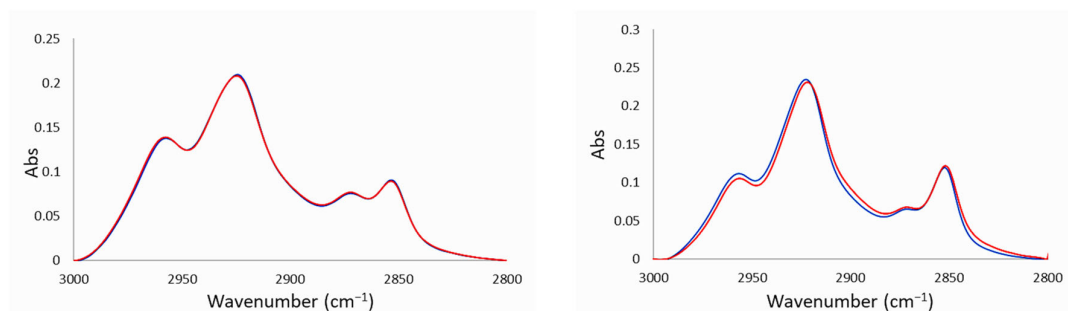

**Figure S6.** a) PCA and loadings of GICs cell samples in the lipids region. GIC7 control vs GIC7 incubated with Na[*o*-COSAN] 2mM. b) PCA and loadings of PG88 cell samples in the lipids region. PG88 control vs PG88 incubated with Na[COSAN] 2mM.

**a**

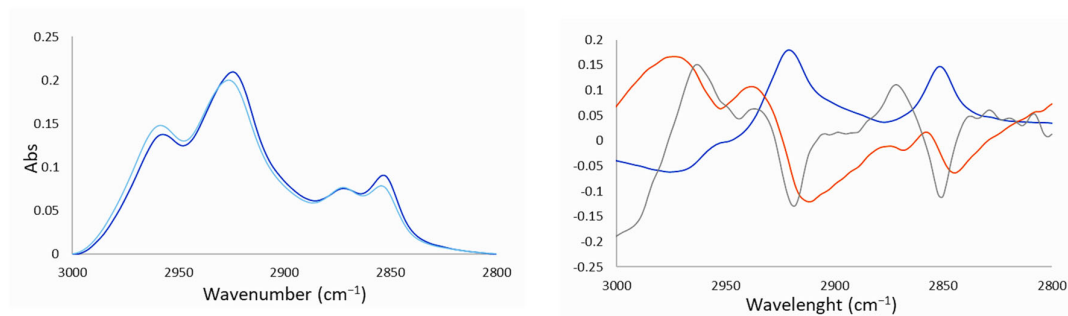

**b**

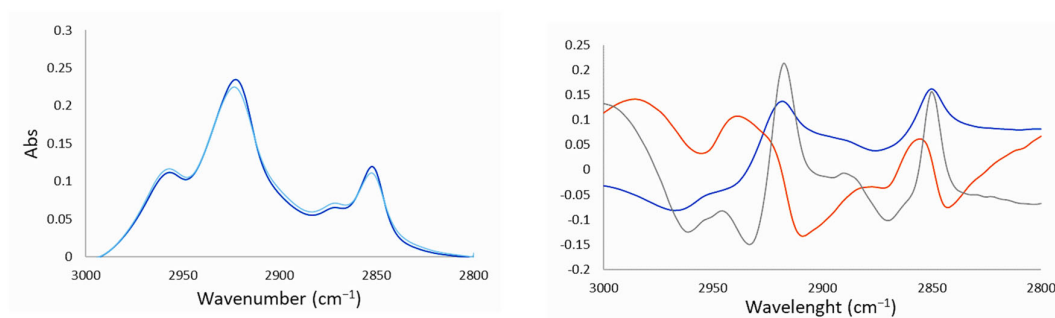



**Table S1.** Amide I / Amide II ratios of absorbance in GIC7 and PG88 samples.

| Sample           | Ratio (Amide I/AmideII) |
|------------------|-------------------------|
| GIC7 Control     | 1.81±0.16               |
| GIC7 200 $\mu$ M | 1.76±0.25               |
| GIC7 2 mM        | 1.67±0.20               |
| PG88 Control     | 1.76±0.12               |
| PG88 200 $\mu$ M | 1.52±0.14               |
| PG88 2 mM        | 1.44±0.14               |

**Table S2.** Ratios of 2960  $\text{cm}^{-1}$  and 2921  $\text{cm}^{-1}$  signals in GIC7 and PG88 samples.

| Sample           | Ratio ( $\text{aCH}_3/\text{aCH}_2$ ) |
|------------------|---------------------------------------|
| GIC7 Control     | 0.67±0.08                             |
| GIC7 200 $\mu$ M | 0.70±0.09                             |
| GIC7 2 mM        | 0.77±0.06                             |
| PG88 Control     | 0.46±0.06                             |
| PG88 200 $\mu$ M | 0.40±0.06                             |
| PG88 2 mM        | 0.47±0.07                             |

**Table S3.** Ratios of 3010 cm<sup>-1</sup> band integral and 2850 cm<sup>-1</sup> band integral in GIC7 and PG88 samples.

| Sample           | Ratio $\int$ -HC=CH- St./ $\int$ -CH <sub>2</sub> - Sym. |
|------------------|----------------------------------------------------------|
| GIC7 Control     | 0.080±0.034                                              |
| GIC7 200 $\mu$ M | 0.047±0.028                                              |
| GIC7 2 mM        | 0.013±0.017                                              |
| PG88 Control     | 0.051±0.014                                              |
| PG88 200 $\mu$ M | 0.064±0.034                                              |
| PG88 2 mM        | 0.030±0.018                                              |

**Table S4.** Statistical data from representative DNA, protein and lipid different peaks comparing GIC7 and PG88 cells.

|                                 | Molecule | $\lambda$ | Significant?<br>P < 0.05? | p-value  | t, df           | Mean Diff. (cnt vs<br>treated) | 95% CI of diff         | R square |
|---------------------------------|----------|-----------|---------------------------|----------|-----------------|--------------------------------|------------------------|----------|
| Unpaired t test<br>GIC7 vs PG88 | DNA      | 1236      | ***                       | P<0.0001 | t=11.52 df=314  | 0.02453 ± 0.002129             | 0.02036 to 0.02870     | 0.2972   |
|                                 |          | 949       | ***                       | P<0.0001 | t=8.943 df=314  | 0.008683 ± 0.0009709           | 0.006780 to 0.01059    | 0.203    |
|                                 | FP       | 1655      | ***                       | P<0.0001 | t=28.48 df=314  | 0.06093 ± 0.002139             | 0.05673 to 0.06512     | 0.7209   |
|                                 |          | 1570      | ***                       | P<0.0001 | t=5.404 df=314  | -0.003433 ± 0.0006352          | -0.004678 to -0.002188 | 0.08509  |
|                                 |          | 2966      | ns                        | 0.4725   | t=0.7193 df=314 | -0.001853 ± 0.002576           | -0.006901 to 0.003196  | 0.001645 |
|                                 | Lipids   | 2922      | ***                       | P<0.0001 | t=7.090 df=314  | -0.03537 ± 0.004988            | -0.04514 to -0.02559   | 0.138    |
|                                 |          | 2852      | ***                       | P<0.0001 | t=9.398 df=314  | -0.02271 ± 0.002417            | -0.02745 to -0.01798   | 0.2195   |

**Table S5.** Statistical data from representative DNA, protein and lipid different peaks in 200  $\mu\text{m}$  Na[*o*-COSAN] 5 h treated v.s. untreated GIC7 and PG88 cells.

| Unpaired t test | Molecule | $\lambda$ | Significant?<br>P < 0.05? | p-value  | t, df               | Mean Diff.<br>(cnt vs<br>treated) | 95% CI of<br>diff          | R square  |
|-----------------|----------|-----------|---------------------------|----------|---------------------|-----------------------------------|----------------------------|-----------|
| GIC7            | DNA      | 1236      | ns                        | 0,2495   | t=1.154 df=295      | 0.004059 $\pm$<br>0.003518        | -0.002837 to<br>0.01096    | 0,004492  |
|                 |          | 949       | ***                       | 0,0004   | t=3.563 df=295      | -0.006368 $\pm$<br>0.001787       | -0.009871 to -<br>0.002865 | 0,04125   |
|                 | FP       | 1655      | **                        | 0,0033   | t=2.966 df=295      | -0.01048 $\pm$<br>0.003532        | -0.01740 to -<br>0.003553  | 0,02895   |
|                 |          | 1570      | ***                       | P<0.0001 | t=8.648 df=295      | -0.009467 $\pm$<br>0.001095       | -0.01161 to -<br>0.007321  | 0,2022    |
|                 | Lipids   | 2966      | ns                        | 0,6499   | t=0.4543<br>df=295  | 0.001549 $\pm$<br>0.003410        | -0.005135 to<br>0.008234   | 0,0006993 |
|                 |          | 2922      | ns                        | 0,1165   | t=1.574 df=295      | 0.008471 $\pm$<br>0.005380        | -0.002074 to<br>0.01902    | 0,008333  |
|                 |          | 2852      | *                         | 0,0439   | t=2.024 df=295      | 0.004800 $\pm$<br>0.002372        | 0.0001512 to<br>0.009449   | 0,01369   |
|                 |          |           |                           |          |                     |                                   |                            |           |
| PG88            | DNA      | 1236      | ***                       | 0,0002   | t=3.756 df=273      | 0.008880 $\pm$<br>0.002364        | 0.004245 to<br>0.01351     | 0,04912   |
|                 |          | 951       | ***                       | P<0.0001 | t=6.544 df=273      | -0.007144 $\pm$<br>0.001092       | -0.009284 to -<br>0.005005 | 0,1356    |
|                 | FP       | 1674      | ***                       | 0,0008   | t=3.403 df=273      | 0.01136 $\pm$<br>0.003339         | 0.004816 to<br>0.01790     | 0,04068   |
|                 |          | 1570      | ns                        | 0,9565   | t=0.05455<br>df=273 | 0.00007323 $\pm$<br>0.001342      | -0.002558 to<br>0.002704   | 0,0000109 |
|                 | Lipids   | 2966      | ***                       | P<0.0001 | t=6.537 df=273      | 0.01729 $\pm$<br>0.002645         | 0.01211 to<br>0.02248      | 0,1353    |
|                 |          | 2922      | ***                       | 0,0002   | t=3.811 df=273      | 0.02808 $\pm$<br>0.007369         | 0.01364 to<br>0.04252      | 0,0505    |
|                 |          | 2852      | *                         | 0,0164   | t=2.414 df=273      | 0.009733 $\pm$<br>0.004032        | 0.001830 to<br>0.01764     | 0,0209    |
|                 |          |           |                           |          |                     |                                   |                            |           |
